# Supplementary material for: Critical metal recovery from spent lithium-ion batteries’ leaching solution using electrodialysis technologies: strategies and challenges
Source: Royal Society of Chemistry journal article supplement (doi:10.1039/d4qi01978d), 2024-01-01
Supplement: d4qi01978d1.pdf [file d4qi01978d1.pdf]

**Critical metals recovery from the spent lithium-ion batteries'  
leaching solution using electrodialysis technologies: strategies and  
challenges**

Tianshu Zhang<sup>1</sup>, Yijun Qian<sup>1\*</sup>, Changyong Zhang<sup>2</sup>, Tao Qian<sup>3</sup> and Chenglin Yan<sup>1,4,\*</sup>

1. College of Energy, Key Laboratory of Advanced Carbon Materials and Wearable Energy Technologies of Jiangsu Province, Soochow University, 215006, Suzhou, China

2. CAS Key Laboratory of Urban Pollutant Conversion, Department of Environmental Science and Engineering, University of Science and Technology of China, Hefei 230026, China

3. College of Chemistry and Chemical Engineering, Nantong University, Seyuan 9, Nantong 226019, China

4. School of Petrochemical Engineering, Changzhou University, Changzhou 213164, China

**\*Corresponding authors.** E-mails: [yjqian@suda.edu.cn](mailto:yjqian@suda.edu.cn), [c.yan@suda.edu.cn](mailto:c.yan@suda.edu.cn).

**Table S1.** The performance data of several separation methods in the recovery of leaching solution from spent lithium-ion batteries

| Method             | Target metals  | Solution composition                                                                                                                                                                                   | Solvent liquid                             | pH   |                      |
|--------------------|----------------|--------------------------------------------------------------------------------------------------------------------------------------------------------------------------------------------------------|--------------------------------------------|------|----------------------|
| Electrodialysis    | Li, Ni, Co, Mn | $C_{Li}=1.00 \times 10^{-2} \text{ M}$ ,<br>$C_{Ni}=C_{Co}=C_{Mn}=3.33 \times 10^{-3} \text{ M}$                                                                                                       | EDTA                                       | 2    | St                   |
|                    |                |                                                                                                                                                                                                        |                                            | 3    | St                   |
|                    |                |                                                                                                                                                                                                        | –                                          | 1.5  | St                   |
| Solvent extraction | Li, Ni, Co     | $C_{Li}=2.8 \text{ g L}^{-1}$ , $C_{Ni}=0.5 \text{ g L}^{-1}$ ,<br>$C_{Co}=14.4 \text{ g L}^{-1}$                                                                                                      | Cyanex 272+TOA                             | ~7   | The<br>The           |
| Solvent extraction | Li, Co, Mn     | $C_{Li}=C_{Co}=C_{Mn}=4 \times 10^{-3} \text{ M}$                                                                                                                                                      | Cyanex272+PC-88A                           | 4.95 | The<br>order         |
| Solvent extraction | Li, Ni, Co     | $C_{Fe}=3.6 \text{ g L}^{-1}$ , $C_{Cu}=1.8 \text{ g L}^{-1}$ ,<br>$C_{Mn}=1.8 \text{ g L}^{-1}$ , $C_{Ni}=0.5 \text{ g L}^{-1}$ ,<br>$C_{Co}=20.6 \text{ g L}^{-1}$ , $C_{Li}=2.5 \text{ g L}^{-1}$ . | P507                                       | 3.5  | Reco<br>Recc         |
| Precipitation      | Li, Ni, Co, Mn | 100% of Li, Ni, Co, and Al in NCA material are leached out.                                                                                                                                            | For Co: NaClO                              | 3    | The<br>100%<br>still |
|                    |                |                                                                                                                                                                                                        | For Ni: NaOH                               | 11   |                      |
| Precipitation      | Li, Ni, Co, Mn | LCO, LMO, and LCNM were mixed and leached according to the weight ratio of 1:1:1.                                                                                                                      | For Mn: $\text{KMnO}_4$                    | 2    | The<br>Mn,<br>97.4%  |
|                    |                |                                                                                                                                                                                                        | For Ni: dimethylglyoxime                   | 9    |                      |
|                    |                |                                                                                                                                                                                                        | For Co: NaOH                               | 11   |                      |
|                    |                |                                                                                                                                                                                                        | For Li: saturated $\text{Na}_2\text{CO}_3$ | –    |                      |

**Table S2.** Advantages and disadvantages of the treatment of leaching solutions methods

| Method             | Advantage                                                                                                                                                                 | Disadvantage                                                                                                                                                                                 |
|--------------------|---------------------------------------------------------------------------------------------------------------------------------------------------------------------------|----------------------------------------------------------------------------------------------------------------------------------------------------------------------------------------------|
| Electrodialysis    | <ul style="list-style-type: none"> <li>• Selective ion removal</li> <li>• Low consumption of chemicals</li> <li>• Scalable</li> <li>• Environmentally friendly</li> </ul> | <ul style="list-style-type: none"> <li>• Dependence on electric energy</li> <li>• Membrane fouling</li> <li>• High initial cost</li> </ul>                                                   |
| Precipitation      | <ul style="list-style-type: none"> <li>• Low cost</li> <li>• Low energy consumption</li> </ul>                                                                            | <ul style="list-style-type: none"> <li>• Complicated process</li> <li>• High reagent consumption</li> <li>• Hard to precipitate only one ion</li> <li>• Generation of solid waste</li> </ul> |
| Solvent extraction | <ul style="list-style-type: none"> <li>• High selectivity and recovery</li> <li>• Low energy consumption</li> <li>• Scalable</li> </ul>                                   | <ul style="list-style-type: none"> <li>• High price of solvent</li> <li>• Consumption of organic solvents</li> <li>• Generation of toxic waste liquid</li> </ul>                             |
